# Supplementary material
Source: Springer Nature journal article supplement (https://www.springermedizin.de/resource/supplementary/12874_2010_644_MOESM2_ESM.pdf/9432286)

# Symptom Variables

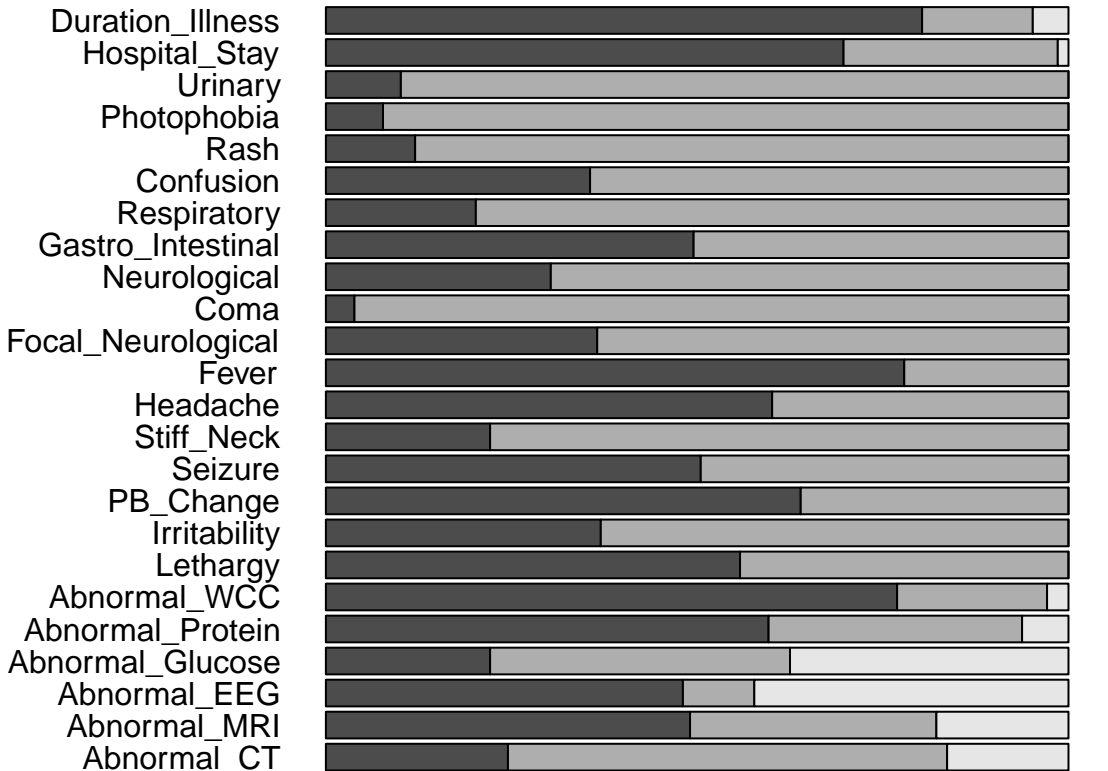

0 20 40 60 80 100

Percent

Supplement: MOESM2 [file 9432286]
